# Supplementary material
Source: HighWire-hosted journal article supplement (https://www.jrheum.org/highwire/filestream/34794/field_highwire_adjunct_files/0/171425DataSuppl.pdf)
Supplement: 171425DataSuppl.pdf [file 171425DataSuppl.pdf]

**Supplementary Table 1.** Patient characteristics in the three groups, and volunteer characteristics.

|                                         | <b>p-value</b> | <b>- A -<br/>axSpA</b> | <b>- B -<br/>Mech. dis.</b> | <b>- C -<br/>Non-specific<br/>back pain</b> | <b>Volunteers</b> |
|-----------------------------------------|----------------|------------------------|-----------------------------|---------------------------------------------|-------------------|
| <b>No</b>                               |                | 58 (52.7 %)            | 36 (32.7 %)                 | 16 (14.5%)                                  | 18                |
| <b>Sex</b>                              | 0.019          |                        |                             |                                             |                   |
| <b>Male</b>                             |                | 35 (60.3 %)            | 11 (30.6 %)                 | 7 (43.7 %)                                  | 9                 |
| <b>Female</b>                           |                | 23 (39.7 %)            | 25 (69.4 %)                 | 9 (56.3 %)                                  | 9                 |
| <b>Age (in years)</b>                   | 0.004          | 34.84 ± 9.07           | 40.17 ± 9.04                | 31.31 ± 9.12                                | 34.6 ± 10.0       |
| <b>IBP</b>                              | 0.429          | 48 (82.8 %)            | 28 (77.8 %)                 | 11 (68.8 %)                                 | 0                 |
| <b>Symptom duration<br/>(in months)</b> | 0.252          | 94.05 ± 98.96          | 81.68 ± 93.36               | 44.07 ± 45.34                               | 0                 |
| <b>BASDAI</b>                           | 0.793          | 4.47 ± 2.12            | 4.29 ± 1.76                 | 4.55 ± 1.46                                 | 0                 |
| <b>HLA-B27 +</b>                        | 0.001          | 47 (81.0 %)            | 18 (50.0 %)                 | 6 (37.5 %)                                  | -                 |
| <b>CRP (in mg/dl)</b>                   | 0.001          | 6.21 ± 7.11            | 1.46 ± 1.84                 | 3.73 ± 5.75                                 | -                 |

Values are means ± standard deviation; percentages in brackets when appropriate. axSpA = axial spondyloarthritis; Mech. dis. = mechanical disease (osteitis condensans and osteoarthritis patients); non-specific back pain (no structural/conspicuous radiological findings); IBP= inflammatory back pain positive; BASDAI=Bath Ankylosing Spondylitis Disease Activity Index; HLA-B27 +=Human leucocyte antigen B27 positive; CRP= C-reactive protein serum level in mg/dl;. Sign.: significance level calculated using Kruskal-Wallis test, only used to compare three patient groups.

**Supplementary Table 2.** Affected regions with different grades of osteitis (0-3) for all patients, three groups (axial spondyloarthritis, mechanical disease, non-specific back pain), and volunteers.

|                                       | Grade of Osteitis | PD-STIR  |          | T2-FS    |          |
|---------------------------------------|-------------------|----------|----------|----------|----------|
|                                       |                   | Reader 1 | Reader 2 | Reader 1 | Reader 2 |
| <b>All Patients</b>                   |                   |          |          |          |          |
| Regions=2640                          | <b>0</b>          | 2429     | 2302     | 2290     | 2061     |
|                                       | <b>1</b>          | 156      | 255      | 240      | 381      |
|                                       | <b>2</b>          | 41       | 70       | 69       | 122      |
|                                       | <b>3</b>          | 14       | 13       | 17       | 52       |
| Missing                               |                   | 0        | 0        | 24       | 24       |
| <b>Group A (axSpA)</b>                |                   |          |          |          |          |
| Regions=1392                          | <b>0</b>          | 1231     | 1144     | 1130     | 940      |
|                                       | <b>1</b>          | 112      | 174      | 170      | 294      |
|                                       | <b>2</b>          | 35       | 62       | 61       | 97       |
|                                       | <b>3</b>          | 14       | 12       | 15       | 45       |
| Missing                               |                   | 0        | 0        | 16       | 16       |
| <b>Group B (mechanical disease)</b>   |                   |          |          |          |          |
| Regions=864                           | <b>0</b>          | 828      | 799      | 788      | 756      |
|                                       | <b>1</b>          | 30       | 56       | 58       | 70       |
|                                       | <b>2</b>          | 6        | 8        | 8        | 23       |
|                                       | <b>3</b>          | 0        | 1        | 2        | 7        |
| Missing                               |                   | 0        | 0        | 8        | 8        |
| <b>Group C (unspecific back pain)</b> |                   |          |          |          |          |
| Regions=384                           | <b>0</b>          | 370      | 359      | 372      | 365      |
|                                       | <b>1</b>          | 14       | 25       | 12       | 17       |
|                                       | <b>2</b>          | 0        | 0        | 0        | 2        |
|                                       | <b>3</b>          | 0        | 0        | 0        | 0        |
| Missing                               |                   | 0        | 0        | 0        | 0        |
| <b>Volunteers</b>                     |                   |          |          |          |          |
| Regions=432                           | <b>0</b>          | 426      | 414      | 413      | 407      |
|                                       | <b>1</b>          | 6        | 18       | 19       | 23       |
|                                       | <b>2</b>          | 0        | 0        | 0        | 2        |
|                                       | <b>3</b>          | 0        | 0        | 0        | 0        |
| Missing                               |                   | 0        | 0        | 0        | 0        |

Supplementary Figure 1

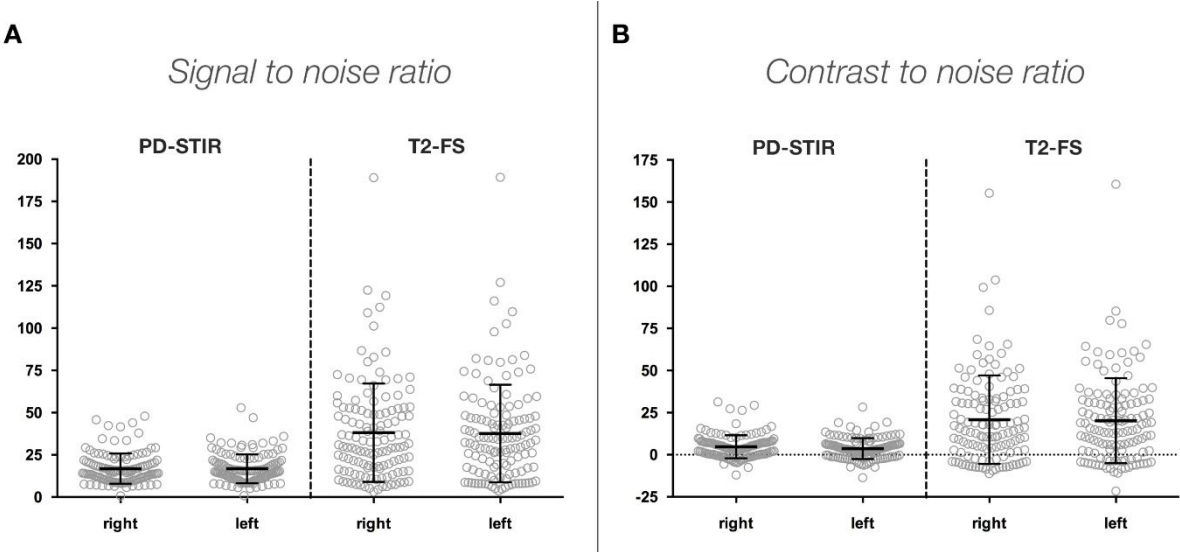

**A.** Signal-to-noise ratio (SNR) values for both sides of SIJ and for each subject. **B.** Contrast-to-noise ratio (CNR) values for both sides of SIJ and for each subject.
